# Supplementary material
Source: PubMed Central journal article supplement (PMC5710339)
Supplement: jamadermatol-153-999-s001.pdf [file jamadermatol-153-999-s001.pdf]

## Supplementary Online Content

Haugh AM, Njauw C-N, Bublely JA, et al. Genotypic and phenotypic features of BAP1 cancer syndrome: a report of 8 new families and review of cases in the literature. *JAMA Dermatol*. Published online August 9, 2017. doi:10.1001/jamadermatol.2017.2330

**eTable 1.** *BAP1* mutations seen in multiple families and associated phenotype in affected family members.

**eTable 2.** Patients with multiple melanomas. As seen in the table, most patients with multiple melanomas had truncating or missense mutations in the UCH domain of the BAP1 protein.

**eTable 3.** Patients with mesothelioma and *BAP1* mutations (ages provided where available).

**eTable 4.** Patients with germline *BAP1* mutations at or above the age of 56 without a diagnosis of mesothelioma.

This supplementary material has been provided by the authors to give readers additional information about their work.

**Supplementary Information:** The BAP1 Cancer Syndrome: A Report of 8 New Families and Review of Genotypic and Phenotypic Features

**Supplemental Table 1.** *BAP1* mutations seen in multiple families and associated phenotype in affected family members.

| <b>Mutation</b>                   | <b>Papers</b>                                                                                                                       | <b>Associated Phenotype in Tested Patients</b>                                                                                                                                                   |
|-----------------------------------|-------------------------------------------------------------------------------------------------------------------------------------|--------------------------------------------------------------------------------------------------------------------------------------------------------------------------------------------------|
| c.1717delC, p.L573fs*3            | Testa et al, 2011<br>Cebulla et al, 2015<br>Carbone et al, 2015 (three families)<br>Ohar et al, 2016 (two families)<br>Our Family 3 | Mesothelioma(64), UM(58)<br>UM(18)<br>CM(32), mesothelioma(55,60,51,52,67, 70), bone(71), BCC(67,71), RCC(70), UM(71), breast(50)<br>Mesothelioma (asbestos exposed) in both families<br>BDT(10) |
| c.1153C>T, p.R385X                | Njauw et al, 2012<br>Betti et al, 2016                                                                                              | BDT, UM(51,55, 57, 59), breast(x2), lung(57, x2), CM(36, 60), cholangiocarcinoma<br>CM(53,57), meningioma(37), mesothelioma(53)                                                                  |
| c.2050C>T, p.Q684X                | Testa et al, 2011<br>Pilarski et al, 2014                                                                                           | Mesothelioma(50,59, 63), BCC, SCC, UM, pancreatic cancer<br>UM(41), mesothelioma, epithelial malignancy of unknown origin(42)                                                                    |
| c.588G>A, p.W196X                 | Popova et al, 2013<br>de la Fouchardiere, 2015                                                                                      | CM(47)<br>Papillary thyroid cancer(41), leptomenigeal melanoma(40)                                                                                                                               |
| c.1938T>A, p.Y646X                | Cheung et al, 2015<br>Carbone et al, 2015                                                                                           | Mesothelioma (x2), BCC (x2), meningioma, CM(x2), BDTs<br>Mesothelioma                                                                                                                            |
| c.1882_1885delTCAC,<br>p.S628fs*8 | Testa et al, 2011<br>Pilarski et al, 2014<br>Ohar et al, 2016                                                                       | UM, mesothelioma<br>CM, UM, colorectal cancer, RCC (x2), breast cancer<br>UM, mesothelioma (asbestos exposed)                                                                                    |

**Supplemental Table 2.** Patients with multiple melanomas. As seen in the table, most patients with multiple melanomas had truncating or missense mutations in the UCH domain of the BAP1 protein.

| <b>Paper</b>       | <b>Mutation</b>            | <b>Domain Affected</b> | <b>Mutation Type</b> | <b>Phenotype</b>                                   |
|--------------------|----------------------------|------------------------|----------------------|----------------------------------------------------|
| Gerami et al, 2016 | c.592G>T, p.E198X          | UCH                    | Nonsense             | 7 CM first seen at age 43                          |
| Njauw et al, 2012  | c.706_707insG, p.D236Gfs*7 | UCH                    | Frameshift           | 7 CM starting at age 31; at least 10 BDTs          |
| Betti et al, 2016  | c.1153C>T, p.Arg385X       | none                   | Nonsense             | CM at 53, 57, meningioma at 37, mesothelioma at 53 |
| Aoude et al, 2015  | c.361G>C, p.G121R          | UCH                    | Missense             | CM at 25 and 72                                    |
| Aoude et al, 2015  | c.448C>T, p.R150C          | UCH                    | Missense             | CM at 32 and 57, breast cancer at 57               |
| Popova et al, 2013 | c.37+1delG                 | UCH                    | Splice site          | CM at 29,31,34; RCC at 36                          |
| Popova et al, 2013 | c.660-11T>A                | UCH                    | Splice site          | CM at 47 and 52                                    |
| Wadt et al, 2012   | c.1708C>G, p.L570V         | none                   | Missense             | CM at 27 (x2), another CM at 33                    |

**Supplemental Table 3.** Patients with mesothelioma and *BAP1* mutations (ages provided where available).

| Paper                    | Mutation                         | Effect on Protein      | Phenotype                                                    |
|--------------------------|----------------------------------|------------------------|--------------------------------------------------------------|
| Ohar et al, 2016         | c.1695insT, p.Glu566fs*1         | Frameshift; truncating | Mesothelioma (asbestos exposed), RCC; breast cancer          |
| Ohar et al, 2016         | c.1717delC, p.Leu573fs*3         | Frameshift; truncating | Mesothelioma (asbestos exposed)                              |
| Ohar et al, 2016         | c.1882_1885delTCAC, p.Ser628fs*8 | Frameshift; truncating | Mesothelioma (asbestos exposed), UM                          |
| Ohar et al, 2016         | c.1717delC, p.Leu573fs*3         | Frameshift; truncating | Mesothelioma (asbestos exposed)                              |
| Testa et al, 2011        | c.2050C>T, p.Q684X               | Truncating             | Mesothelioma(50)                                             |
| Testa et al, 2011        | c.2050C>T, p.Q684X               | Truncating             | Mesothelioma(59), UM                                         |
| Testa et al, 2011        | c.2050C>T, p.Q684X               | Truncating             | Mesothelioma(63)                                             |
| Wadt et al, 2015         | c.1209_1210dupT; p.D404X         | Truncating             | Mesothelioma(62)                                             |
| Wadt et al, 2015         | c.1209_1210dupT; p.D404X         | Truncating             | Mesothelioma(46), Spitz nevus(32)                            |
| Wadt et al, 2015         | c.1209_1210dupT; p.D404X         | Truncating             | Mesothelioma(51), BCC(50)                                    |
| Wadt et al, 2015         | c.823C>T, p.Q280*                | Truncating             | Mesothelioma(56), CM(55),                                    |
| Popova et al, 2013       | c.1654delG, p.Asp552Ilefs*19     | Frameshift; truncating | Mesothelioma(41)                                             |
| Popova et al, 2013       | c.1654delG, p.Asp552Ilefsx19     | Frameshift; truncating | UM(52); mesothelioma(59)                                     |
| Popova et al, 2013       | c.670dupC, p.H224Pfs*1           | Frameshift; truncating | Mesothelioma(41)                                             |
| Popova et al, 2013       | c.1647delT; p.Val550Serfs*21     | Frameshift; truncating | Mesothelioma(62)                                             |
| Cheung et al, 2015       | c.1938T>A, p.Y646X               | Truncating             | Mesothelioma,CM                                              |
| Cheung et al, 2015       | c.1938T>A, p.Y646X               | Truncating             | Mesothelioma, BCC, meningioma                                |
| Abdel-Rahman et al, 2011 | c.799C>T, p.Q267X                | Truncating             | Mesothelioma                                                 |
| Testa et al, 2011        | c.1832delC, p.Leu573fs*3         | Frameshift; truncating | Mesothelioma(55,60), UM(48), CM(32)                          |
| Testa et al, 2011        | c.2008-2011delTCAC, p.Ser628fs*8 | Frameshift; truncating | mesothelioma(55), UM(53)                                     |
| Wiesner et al, 2012      | c.79delG, p.V27Cfs*45            | Frameshift; truncating | Mesothelioma                                                 |
| Wiesner et al, 2012      | c.79delG, p.V27Cfs*45            | Frameshift; truncating | Mesothelioma                                                 |
| Wiesner et al, 2012      | c.79delG, p.V27Cfs*45            | Frameshift; truncating | Mesothelioma, BDTs                                           |
| Ribeiro et al, 2013      | c.758_759insA, p.Gln253fs*31     | Frameshift; truncating | Mesothelioma(56), UM(56)                                     |
| Ribeiro et al, 2013      | c.758_759insA, p.Gln253fs*31     | Frameshift; truncating | Mesothelioma(44)                                             |
| Pilarski et al, 2014     | c.2050C>T, p.Q684X               | Truncating             | Mesothelioma                                                 |
| Betti et al, 2015        | c.46_47insA, p.Thr16fs*52        | Frameshift; truncating | Mesothelioma(63); town in Italy with heavy asbestos exposure |
| Betti et al, 2015        | c.46_47insA, p.Thr16fs*52        | Frameshift; truncating | Mesothelioma(79); town in Italy with heavy asbestos exposure |

| <b>Paper</b>        | <b>Mutation</b>               | <b>Effect on Protein</b> | <b>Phenotype</b>                             |
|---------------------|-------------------------------|--------------------------|----------------------------------------------|
| Betti et al, 2016   | c.1153C>T, p.Arg385X          | Truncating               | Meningioma(37), mesothelioma(53), CM(53, 57) |
| Carbone et al, 2015 | c.1938T>A, p.Y646X            | Truncating               | Mesothelioma                                 |
| Carbone et al, 2015 | c.1717_1717delC, p.Leu573fs*3 | Frameshift; truncating   | Mesothelioma(51)                             |
| Carbone et al, 2015 | c.1717_1717delC, p.Leu573fs*3 | Frameshift; truncating   | Mesothelioma(52)                             |

### **Supplemental Table 3 Continued**

| <b>Paper</b>         | <b>Mutation</b>               | <b>Effect on Protein</b>                                                                      | <b>Phenotype</b>                                                                                                         |
|----------------------|-------------------------------|-----------------------------------------------------------------------------------------------|--------------------------------------------------------------------------------------------------------------------------|
| Carbone et al, 2015  | c.1717_1717delC, p.Leu573fs*3 | Frameshift; truncating                                                                        | BCC(61, 71), mesothelioma(67), RCC(70), UM(71)                                                                           |
| Carbone et al, 2015  | c.1717_1717delC, p.Leu573fs*3 | Frameshift; truncating                                                                        | Mesothelioma(55)                                                                                                         |
| Rai et al, 2015      | c.539T>C, p.L180P             | Missense                                                                                      | Mesothelioma(71), CM(72), multiple BCCs beginning at 56                                                                  |
| Rai et al, 2015      | c.256-4_256-2del              | Potential splice site; RT-pCR found two splice products, both affecting protein length        | Mesothelioma                                                                                                             |
| Ohar et al, 2016     | c.1729+1G>A                   | Mini-gene expression assay showed mutation lead to an RNA message lacking exon 13; frameshift | Mesothelioma (asbestos exposed)                                                                                          |
| Ohar et al, 2016     | c.1891+1G>A                   | Retention of a portion of intron 14; expected to lead to frameshift                           | Mesothelioma (asbestos exposed)                                                                                          |
| Testa et al, 2011    | c.438-2A>G, p.P147fs*48       | Frameshift; truncating                                                                        | Mesothelioma(58)                                                                                                         |
| Testa et al, 2011    | c.438-2A>G, p.P147fs*48       | Frameshift; truncating                                                                        | Mesothelioma(50)                                                                                                         |
| Testa et al, 2011    | c.438-2A>G, p.P147fs*48       | Frameshift; truncating                                                                        | Mesothelioma(58)                                                                                                         |
| Testa et al, 2011    | c.438-2A>G, p.P147fs*48       | Frameshift; truncating                                                                        | Mesothelioma(44)                                                                                                         |
| Testa et al, 2011    | c.438-2A>G, p.P147fs*48       | Frameshift; truncating                                                                        | Mesothelioma(36)                                                                                                         |
| Wadt et al, 2012     | c.1708C>G, p.Leu570Val        | Expected to lead to p.Leu570fs*40 due to aberrant splicing                                    | Breast cancer (74), peritoneal mesothelial hyperplasia with atypia suspected to be peritoneal papillary mesothelioma(84) |
| Carbone et al, 2015  | c.1717_1717delC, p.Leu573fs*3 | Frameshift; truncating                                                                        | Breast cancer(50), mesothelioma(70)                                                                                      |
| Klebe et al, 2015    | c.518G>A, p.Tyr173Cys         | Missense                                                                                      | UM (72), cholangiocarcinoma(72), mesothelioma(72)                                                                        |
| Our Patient Family 5 | exon 3 deletion               | Truncating                                                                                    | Meningioma(36), CM(41), RCC and prostate cancer(51), mesothelioma(55), BDTx2(56)                                         |

|                         |          |                        |                  |
|-------------------------|----------|------------------------|------------------|
| Our Patient<br>Family 8 | c.79dupG | Frameshift; truncating | Mesothelioma(36) |
|-------------------------|----------|------------------------|------------------|

**Supplemental Table 4.** Patients with germline *BAP1* mutations at or above the age of 56 without a diagnosis of mesothelioma.

| Paper                 | Mutation                         | Effect on Protein                                                      | Phenotype                                                   |
|-----------------------|----------------------------------|------------------------------------------------------------------------|-------------------------------------------------------------|
| Testa et al, 2011     | c.2050C>T, p.Q684X               | Truncating                                                             | BCC; age unavailable but current age 68                     |
| Testa et al, 2011     | c.2050C>T, p.Q684X               | Truncating                                                             | SCC; age unavailable but current age 82                     |
| Testa et al, 2011     | c.2050C>T, p.Q684X               | Truncating                                                             | Pancreatic cancer; age not available but follow up until 73 |
| Njauw et al, 2012     | c.1899_1900ins5, p.Ala643Glyfs*5 | Frameshift; truncating                                                 | UM(58)                                                      |
| Njauw et al, 2012     | c.1153C>T, p.Arg385X             | Truncating                                                             | UM(57), lung cancer(57), melanoma(60)                       |
| Njauw et al, 2012     | c.1153C>T, p.Arg385X             | Truncating                                                             | UM(59), lung cancer, DCIS                                   |
| Njauw et al, 2012     | c.706_707insG, p.Asp236Glyfs*7   | Frameshift; truncating                                                 | UM(62), lung cancer(49)                                     |
| Wiesner et al, 2011   | c.1305delG, p.Gln436Asnfs*135    | Frameshift; truncating                                                 | BAPomas, UM(72)                                             |
| Wadt et al, 2015      | c.1209_1210dupT, p.D404X         | Truncating                                                             | CM(60)                                                      |
| Wadt et al, 2015      | p.178C>T, p.R60X                 | Truncating                                                             | 13 BCCs(65)                                                 |
| Wadt et al, 2015      | p.178C>T, p.R60X                 | Truncating                                                             | UM(59)                                                      |
| Gupta et al, 2015     | c.510_511insT, p.Val171Cysfs*12  | Frameshift; truncating                                                 | colon cancer(53), prostate(63), RCC(63), UM                 |
| Carbone et al, 2015   | c.1717_1717delC, p.Leu573fs*3    | Frameshift; truncating                                                 | nasal carcinoma(56)                                         |
| McDonnell et al, 2016 | c.1777C>T, p.Q593X               | Truncating                                                             | hepatocellular carcinoma(56)                                |
| Gossage et al, 2014   | c.1946G>A, p.C649Y               | Missense                                                               | RCC(56)                                                     |
| Gossage et al 2014    | c.851A>G, p.E284G                | Missense                                                               | RCC(72)                                                     |
| Maerker et al, 2014   | c.299T>C, p.L100P                | Missense                                                               | UM(56), cholangiocarcinoma(71)                              |
| Rai et al, 2015       | c.539T>C, p.L180P                | Missense                                                               | Unaffected(59)                                              |
| Rai et al, 2015       | c.539T>C, p.L180P                | Missense                                                               | UM(60), several BCC(61)                                     |
| Aoude et al, 2015     | c.361G>C, p.G121R                | Missense                                                               | CM(25, 72)                                                  |
| Aoude et al, 2015     | c.448C>T, p.R150C                | Missense                                                               | CM(32, 57) breast(57)                                       |
| Aoude et al, 2015     | c.1337A>T, p.N446I               | Missense                                                               | CM(53), lung cancer(65,68)                                  |
| Testa et al, 2011     | c.438-2A>G, p.P147fs*48          | Frameshift due to splice acceptor mutation                             | RCC(57)                                                     |
| Popova et al, 2013    | c.37+1delG                       | Splice site, unknown predicted effect on protein                       | UM(57)                                                      |
| Wadt et al, 2012      | c.1708C>G, p.Leu570Val           | Expected to lead to p.Leu570fs*40 due to aberrant splicing; truncating | UM(62)                                                      |
| Aoude et al, 2013     | c.581-2A>G                       | Splice site; expected to be truncating                                 | UM(57)                                                      |

|                     |            |                                                                                                                                                     |                            |
|---------------------|------------|-----------------------------------------------------------------------------------------------------------------------------------------------------|----------------------------|
| Aoude et al, 2013   | c.581-2A>G | Splice site; expected to be truncating                                                                                                              | UM(69)                     |
| Aoude et al, 2013   | c.581-2A>G | Splice site; expected to be truncating                                                                                                              | stomach cancer(69)         |
| Turunen et al, 2016 | c.67+1G>T  | Predicted to lead to incorrect splicing; predicted loss of splice donor site with no splice site nearby; possibly leading to non-functional protein | bladder cancer(55), UM(57) |
